# Supplementary material
Source: publisher site journal article supplement (https://www.spandidos-publications.com/6022/downloadSupplementary)
Supplement: Supplementary file 1 [file downloadSupplementary]

Table SI. Mean expression levels of genes detected by RNA-sequencing.

| Gene    | Con-mean    | Enz-mean    | Chid-mean   | Comb-mean   |
|---------|-------------|-------------|-------------|-------------|
| CHST2   | 35.33333333 | 43.66666667 | 208         | 431.3333333 |
| ADRA2C  | 36.33333333 | 36          | 115.6666667 | 137.6666667 |
| CAMK1D  | 13.66666667 | 8.333333333 | 111.6666667 | 184.3333333 |
| TEX15   | 3.333333333 | 1           | 14.33333333 | 61.66666667 |
| KLHDC8A | 2           | 1.666666667 | 13.66666667 | 33.33333333 |
| RYR2    | 4.333333333 | 4.333333333 | 16          | 20.33333333 |
| IRS4    | 2.333333333 | 2.333333333 | 3.666666667 | 23          |
| WNT16   | 3           | 2.666666667 | 6           | 11          |
| GDNF    | 1           | 0.666666667 | 4.666666667 | 13.33333333 |
| CALCB   | 0.666666667 | 0           | 3.333333333 | 12.66666667 |
| BRDT    | 0           | 0.333333333 | 0.333333333 | 8.666666667 |

Con, control; Chid, chidamide; Comb, combination; Enz, enzalutamide.
